# Supplementary material for: Photoelectrochemical water vapor splitting using an ionomer-coated rutile TiO2 thin layer on titanium microfiber felt as an oxygen-evolving photoanode
Source: Royal Society of Chemistry journal article supplement (doi:10.1039/c9se00292h), 2019-01-01
Supplement: c9se00292h1.pdf [file c9se00292h1.pdf]

## Supporting Information

# Photoelectrochemical Water Vapor Splitting Using an Ionomer-Coated Rutile TiO<sub>2</sub> layer on Titanium Microfiber Felt as an Oxygen-Evolving Photoanode

*Fumiaki Amano,\*<sup>ab</sup> Hyosuke Mukohara,<sup>a</sup> Hiroki Sato,<sup>a</sup> and Teruhisa Ohno<sup>b</sup>*

<sup>a</sup> Department of Chemical and Environmental Engineering, The University of Kitakyushu, 1-1 Hibikino, Wakamatsu, Kitakyushu, Fukuoka 808-0135, Japan.

<sup>b</sup> Precursory Research for Embryonic Science and Technology (PRESTO), Japan Science and Technology Agency (JST), 4-1-8 Honcho, Kawaguchi, Saitama 332-0012, Japan.

<sup>c</sup> Graduate School of Engineering, Toyota Technological Institute, 2-12-1 Hisakata, Tempaku, Nagoya 468-8511, Japan.

## Corresponding Author

\*Fumiaki Amano, E-mail: amano@kitakyu-u.ac.jp

**Table S1.** Results of PEC splitting of 3vol% water vapor by R650 | PEM | Pt/CB at 1.2 V under 365-nm UV light ( $40 \text{ mW cm}^{-2}$ ) for 20 h.

| Irradiation / h                            | 1    | 10   | 20   |
|--------------------------------------------|------|------|------|
| IPCE (%)                                   | 11.3 | 6.25 | 3.69 |
| H <sub>2</sub> / $\mu\text{mol min}^{-1}$  | 6.7  | 3.7  | 2.2  |
| O <sub>2</sub> / $\mu\text{mol min}^{-1}$  | 2.7  | 1.7  | 1.1  |
| CO <sub>2</sub> / $\mu\text{mol min}^{-1}$ | 0.77 | 0.11 | 0.06 |
| Faraday efficiency of H <sub>2</sub> (%)   | 101  | 101  | 103  |
| Faraday efficiency of O <sub>2</sub> (%)   | 81   | 95   | 100  |

**Table S2.** EDS elemental analysis of a R650 electrode coated with Nafion ionomer before and after PEC water vapor splitting at 1.2 V for 20 h.

| Sample              | Ti (%) | O (%) | C (%) | F (%) |
|---------------------|--------|-------|-------|-------|
| Before PEC reaction | 15.7   | 26.1  | 19.4  | 38.8  |
| After PEC reaction  | 22.7   | 47.7  | 10.1  | 19.6  |

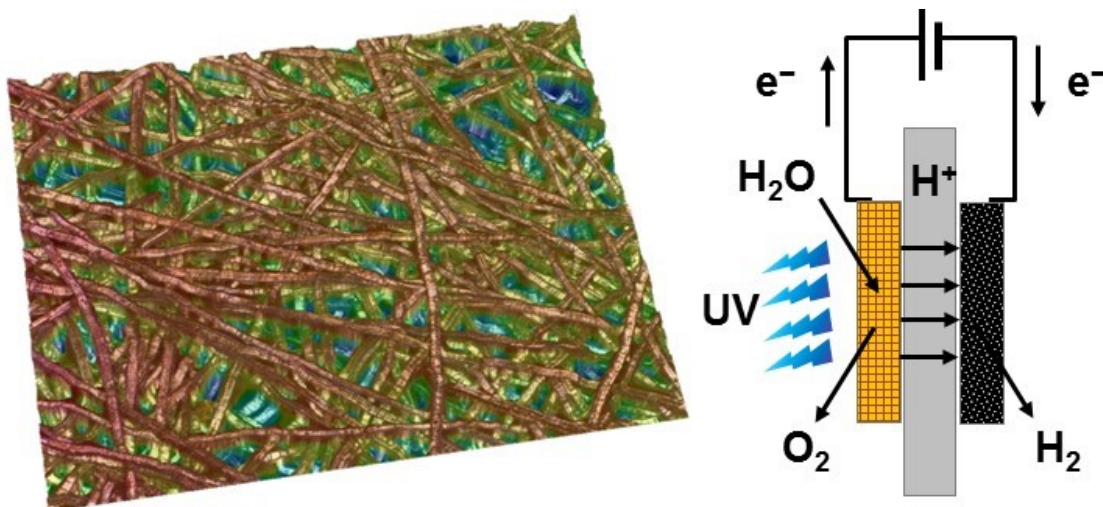

**Figure S1.** Rutile TiO<sub>2</sub> layer electrode on titanium microfibers for photoelectrochemical water vapor splitting into hydrogen (H<sub>2</sub>) and oxygen (O<sub>2</sub>) via a proton exchange membrane. Water was decomposed into O<sub>2</sub> and proton over the TiO<sub>2</sub> electrode under UV irradiation. The photoexcited electrons, which transfer to the counter electrode, reduce proton into H<sub>2</sub>. The two electrodes are separated by the proton exchange membrane.

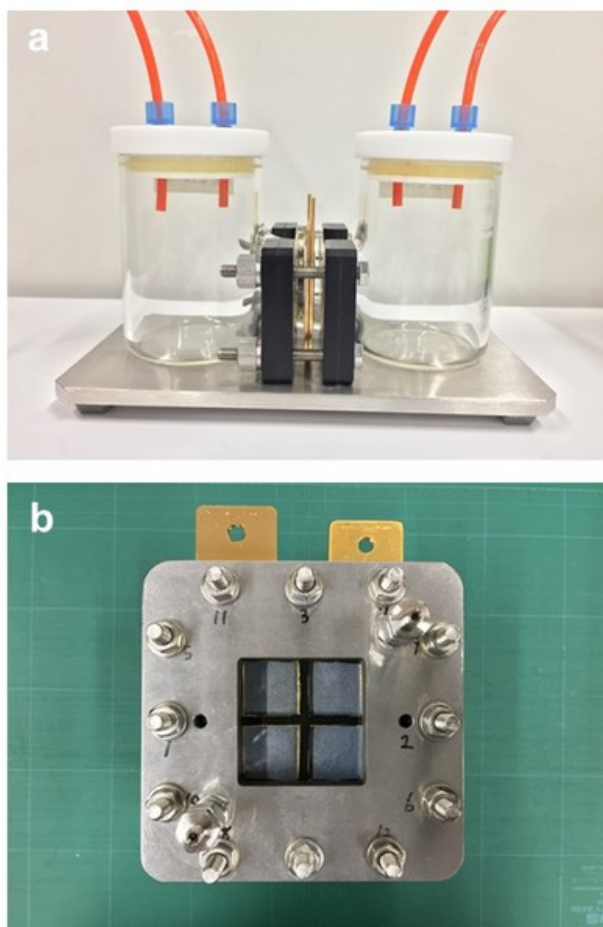

**Figure S2.** Experimental setups of the PEM-PEC system: (a) H-type dual-compartment glass reactor with a photoirradiation area of 2 cm<sup>2</sup> and (b) planar-type dual-compartment stainless-steel reactor with a photoirradiation area of 16 cm<sup>2</sup>.

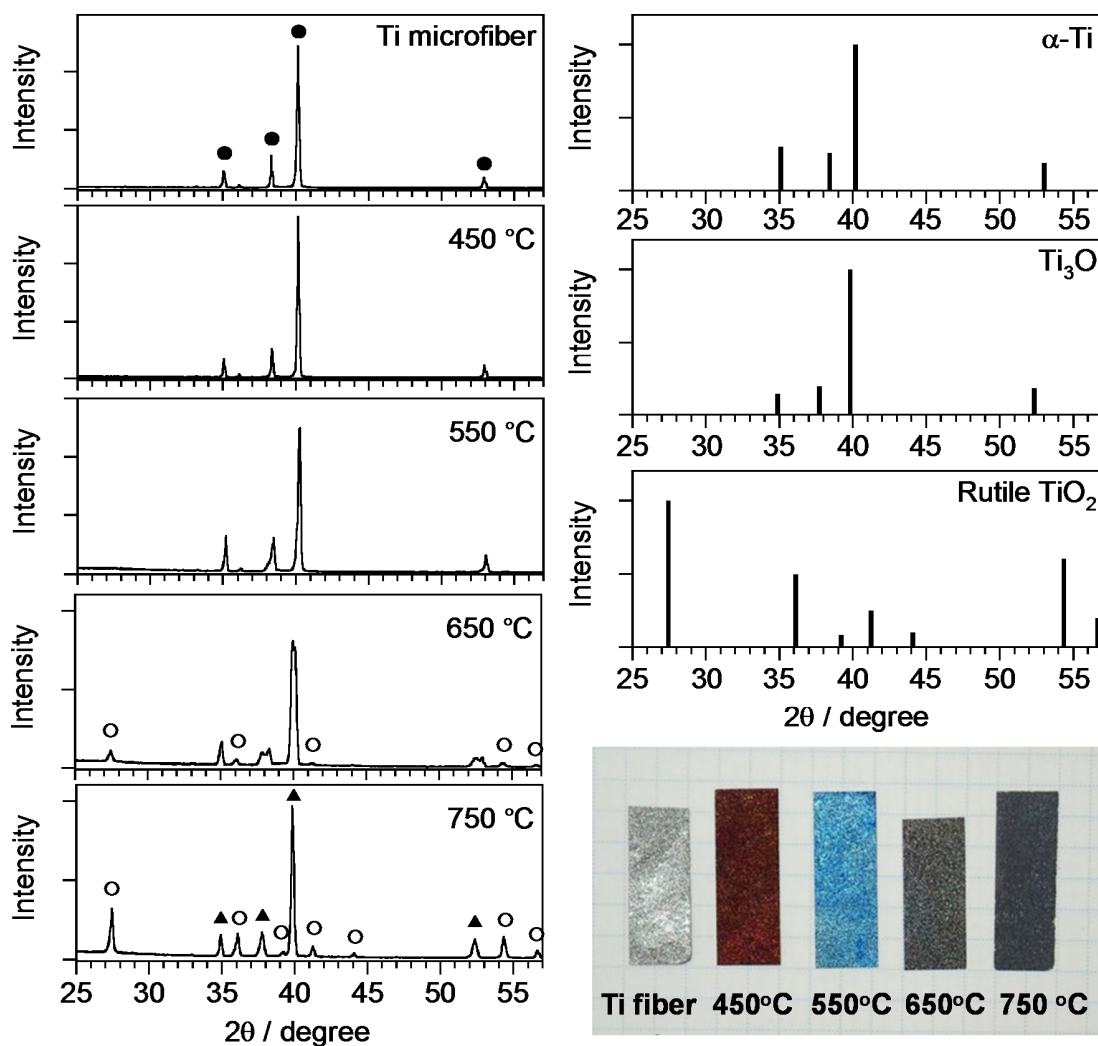

**Figure S3.** X-ray diffraction (XRD) patterns of titanium microfiber felts calcined at different temperatures (450, 550, 650, and 750 °C) for 2 h. The XRD data are taken from a Powder Diffraction File (PDF) provided by the International Centre for Diffraction Data (ICDD): hexagonal  $\alpha$ -Ti (PDF 00-044-1294), hexagonal  $\text{Ti}_3\text{O}$  (PDF 01-073-1583) and rutile  $\text{TiO}_2$  (PDF 00-021-1276). The closed and open circles indicate the peaks assigned to hexagonal  $\alpha$ -Ti and rutile  $\text{TiO}_2$ . The closed triangles indicate the peaks assigned to hexagonal  $\text{Ti}_3\text{O}$ . When the microfiber was calcined at 750 °C, the hexagonal Ti phase was converted to rutile  $\text{TiO}_2$  and hexagonal  $\text{Ti}_3\text{O}$ .

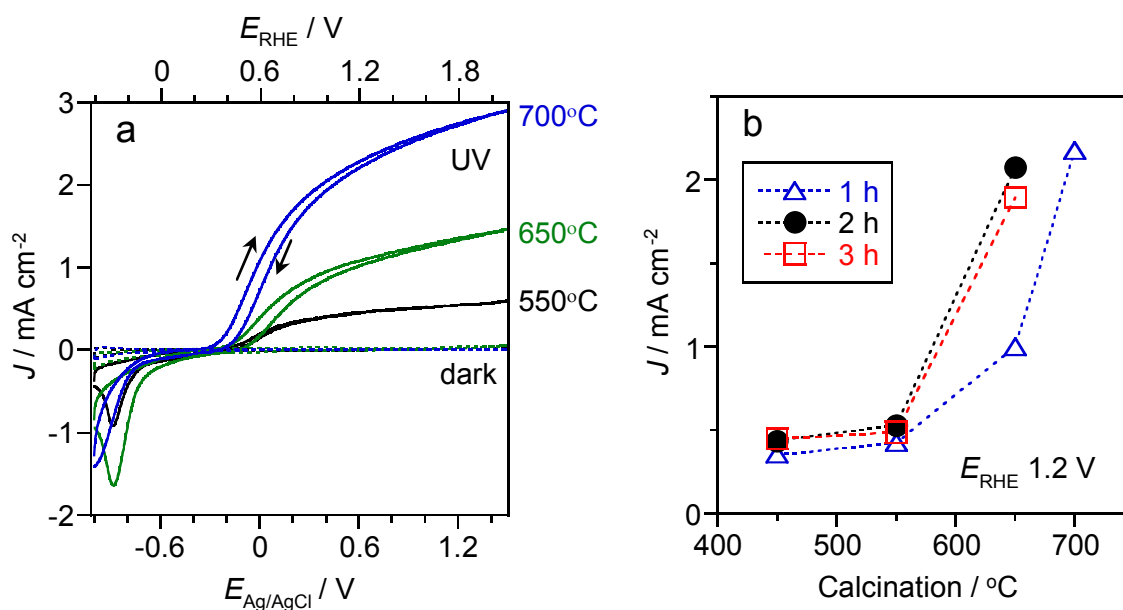

**Figure S4.** Photoelectrochemical (PEC) properties in pH 6.7 aqueous electrolyte under 365-nm UV irradiation ( $43 \text{ mW cm}^{-2}$ ). (a) Current density ( $J$ ) vs. potential curves of Ti microfiber felt calcined at different temperatures for 1 h. The dashed and solid curves were obtained by cyclic voltammetry under dark and photoirradiation conditions, respectively. (b) Effect of temperature and duration (1, 2, and 3 h) in calcination treatment of titanium microfibers on the steady-state photocurrent density ( $J$ ) at 1.2 V vs. RHE in chronoamperometry.

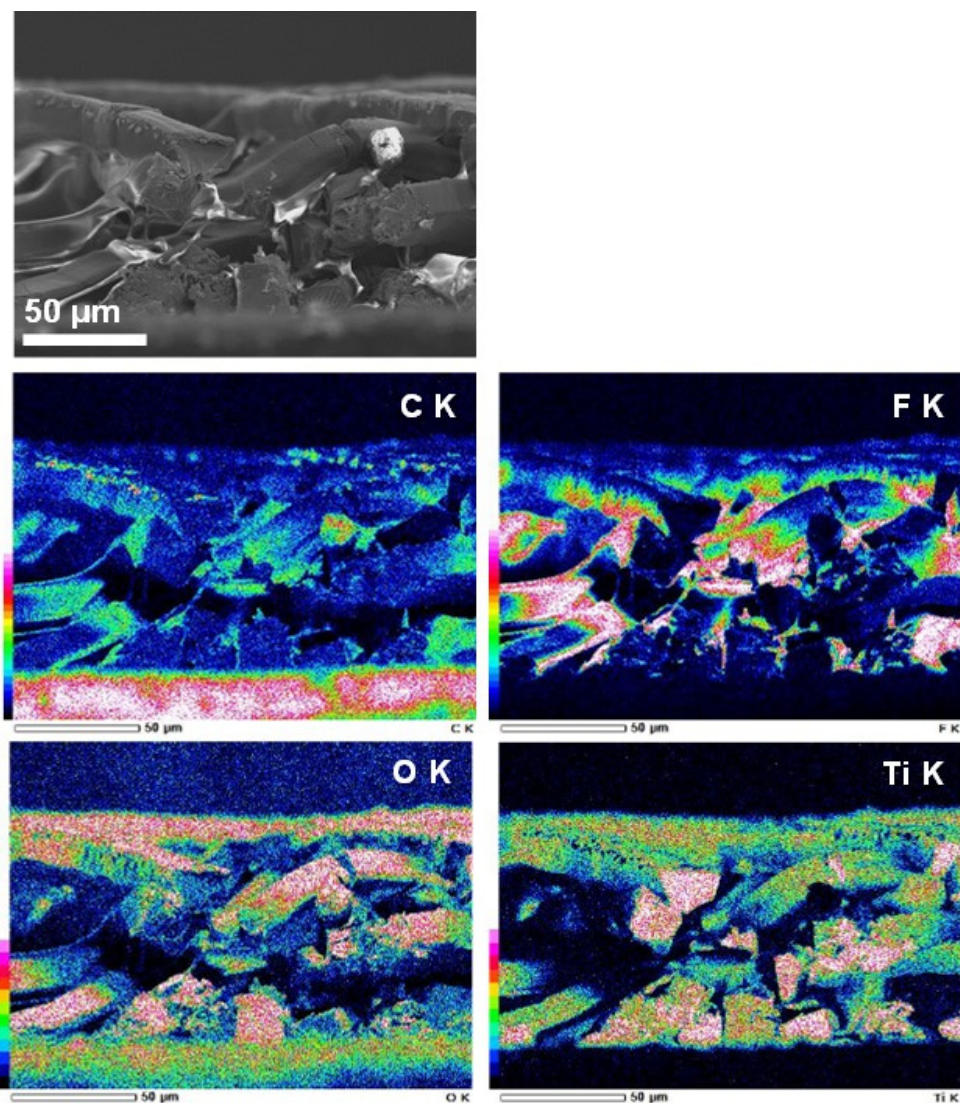

**Figure S5.** SEM image and EDS elemental (carbon, fluorine, oxygen, and titanium) mappings for the cross-section of the R650 microfiber felt with four coats of Nafion ionomer. The element concentration is indicated by the colour bar located at the left bottom of each map. Higher concentrations are red to white, whereas lower concentrations are blue to black.

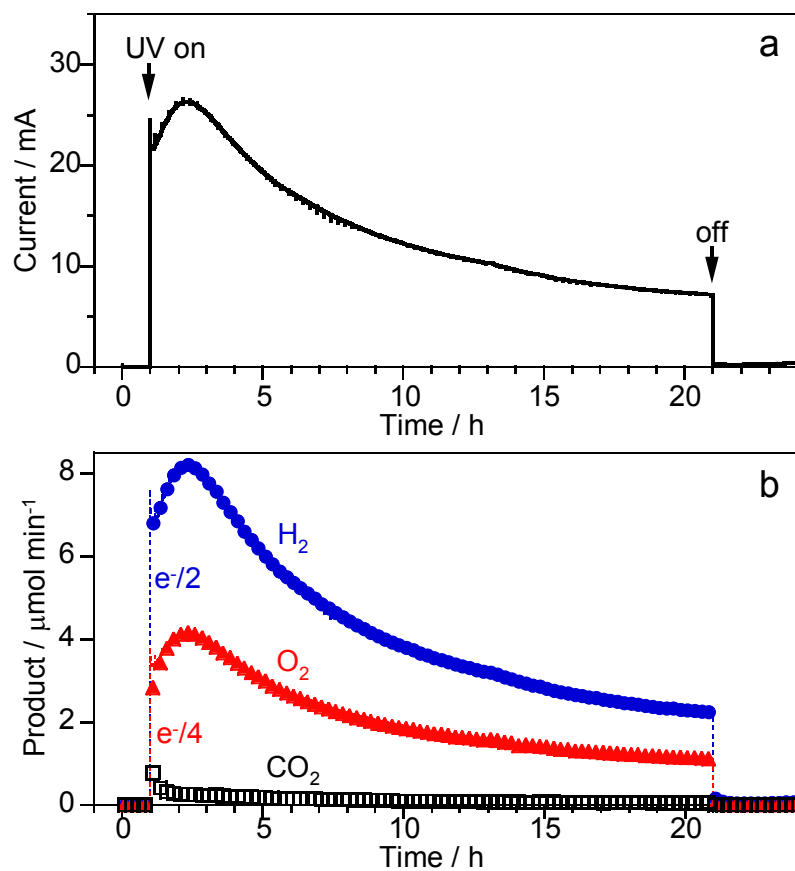

**Figure S6.** PEC water vapor splitting by ionomer-coated R650 | PEM | Pt/CB at 1.2 V under UV irradiation for 20 h. Reaction conditions: 365-nm UV LED, irradiance  $40 \text{ mW cm}^{-2}$ , photoirradiation area  $16 \text{ cm}^2$ , applied voltage 1.2 V, flow rate  $20 \text{ mL min}^{-1}$ ,  $\text{H}_2\text{O}/\text{Ar} = 3/97$ , temperature 298 K, pressure 0.1 MPa, Nafion loading on R650 electrode  $2.20 \text{ mg cm}^{-2}$ .



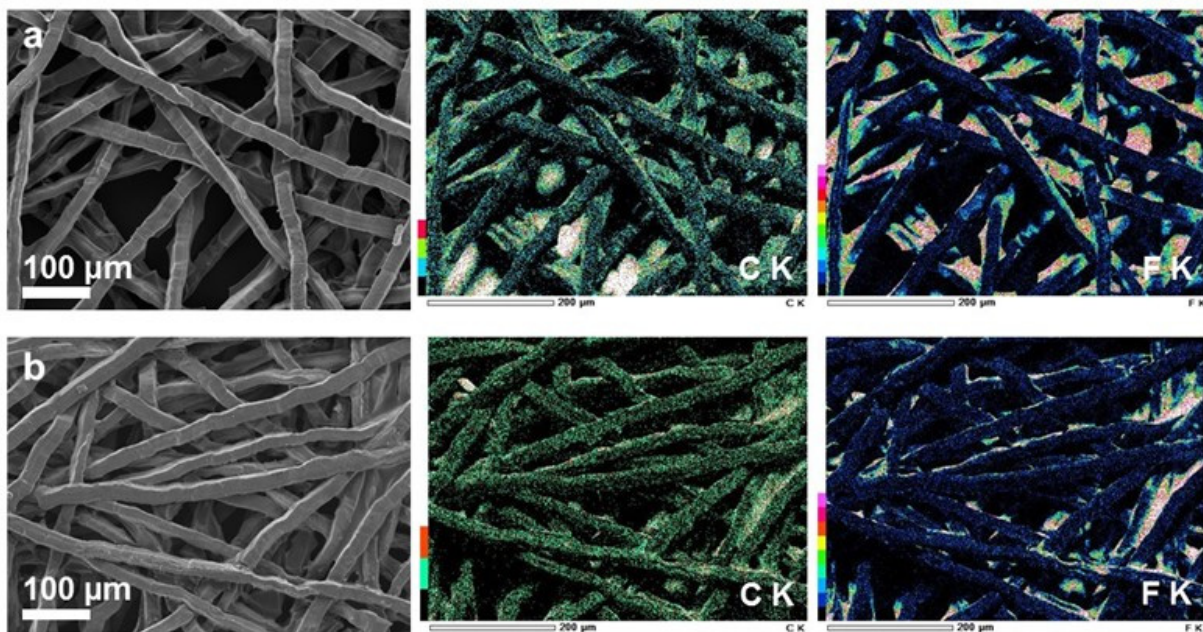

**Figure S7.** SEM images and EDS elemental (carbon and fluorine) mapping images of (a) the R650 electrode with four coats of Nafion ionomer and (b) the electrode after PEC water vapor splitting at 1.2 V under UV irradiation for 20 h.
